# Supplementary material for: Trends in prevalence and incidence of chronic respiratory diseases from 1990 to 2017
Source: PubMed Central journal article supplement (PMC7014719; doi:10.1186/s12931-020-1291-8), 2020-02-11
Supplement: 12931_2020_1291_MOESM1_ESM.pdf [file 12931_2020_1291_MOESM1_ESM.pdf]

Supplemental table 1. International Classification of Diseases and Injuries-10 (ICD-10) diagnosis code

| Cause                                               | ICD-10                            |
|-----------------------------------------------------|-----------------------------------|
| Chronic obstructive pulmonary disease               | J40-J44.9; J47-J47.9              |
| Pneumoconiosis                                      | J60-63.8; J65-J65.0; J92.0        |
| Silicosis                                           | J62-J62.9                         |
| Asbestosis                                          | J61-J61.0; J92.0                  |
| Coal workers pneumoconiosis                         | J60-J60.0                         |
| Other pneumoconiosis                                | J63-63.8; J65-65.0                |
| Asthma                                              | J45-J46.9                         |
| Interstitial lung disease and pulmonary sarcoidosis | D86-86.2; D86.89-D86.9; J84-J84.9 |
