# Supplementary material for: Trends in prevalence and incidence of chronic respiratory diseases from 1990 to 2017
Source: Springer Nature journal article supplement (doi:10.1186/s12931-020-1291-8), 2020-02-11
Supplement: MOESM2 [file 17679198]

Supplemental table 2. The global incidence, ASIR, prevalence and ASPR due to chronic respiratory diseases in 1990 and 2017

|             |                                     | Chronic respiratory diseases         | Chronic obstructive pulmonary disease | Pneumoconiosis                 |                       |                     |                    |                     | Asthma                    | Interstitial lung disease and pulmonary sarcoidosis |                          |
|-------------|-------------------------------------|--------------------------------------|---------------------------------------|--------------------------------|-----------------------|---------------------|--------------------|---------------------|---------------------------|-----------------------------------------------------|--------------------------|
|             |                                     |                                      |                                       | Overall                        | Silicosis             | Asbestosis          | CWP                | Others              |                           |                                                     |                          |
| <b>1990</b> | <b>No. incidence*10<sup>3</sup></b> | 49341.4<br>(43429.9-55491.0) *       | 12824.8<br>(11943.8-13758.7)          | 36.2<br>(32.5-40.0)            | 15.0<br>(12.4-17.7)   | 4.3 (3.5-5.5)       | 9.8 (8.0-12.5)     | 7.0 (6.0-8.3)       | 36232.5 (30222.0-42178.5) | 247.9<br>(226.6-270.1)                              |                          |
|             | <b>ASIR (per 100,000)</b>           | <b>both sexes</b>                    | 924.87<br>(828.62-1023.47)            | 289.10<br>(269.84-309.46)      | 0.86<br>(0.78-0.95)   | 0.36<br>(0.30-0.42) | 0.10 (0.08-0.13)   | 0.24<br>(0.19-0.30) | 0.17<br>(0.14-0.20)       | 629.17 (530.99-723.36)                              | 5.74 (5.27-6.27)         |
|             |                                     | <b>male</b>                          | 935.45<br>(840.71-1031.5)             | 304.76<br>(286.63-323.96)      | 1.70<br>(1.52-1.88)   | 0.74<br>(0.62-0.88) | 0.17 (0.14-0.21)   | 0.50<br>(0.41-0.63) | 0.29<br>(0.24-0.34)       | 622.24 (524.78-716.37)                              | 6.76 (6.21-7.36)         |
|             |                                     | <b>female</b>                        | 919.86<br>(821.49-1020.47)            | 277.64<br>(257.08-298.78)      | 0.17<br>(0.15-0.19)   | 0.04<br>(0.03-0.05) | 0.05 (0.04-0.06)   | 0.02<br>(0.02-0.03) | 0.06<br>(0.05-0.08)       | 637.08 (536.87-733.19)                              | 4.97 (4.54-5.41)         |
|             |                                     | <b>No. prevalence*10<sup>3</sup></b> | 389713.75(362943.03-416351.40)        | 199879.27(184086.58-216261.82) | 291.19(257.76-328.29) | 85.36(66.55-105.58) | 47.13(35.78-63.43) | 85.29(67.32-109.15) | 73.41(60.31-88.43)        | 210684.26(186331.99-236729.869144)                  | 3330.47(3037.41-3661.55) |

|             |                                      |                                        |                                        |                               |                               |                         |                               |                               |                                    |                                  |
|-------------|--------------------------------------|----------------------------------------|----------------------------------------|-------------------------------|-------------------------------|-------------------------|-------------------------------|-------------------------------|------------------------------------|----------------------------------|
|             | <b>both sexes</b>                    | 8157.75(766<br>3.98-<br>8662.19)       | 4669.16(42<br>96.67-<br>5050.60)       | 6.97(6.<br>18-<br>7.87)       | 2.01(1.5<br>7-2.48)           | 1.11(0.85-<br>1.48)     | 2.09(1.65-<br>2.68)           | 1.77(1.46-<br>2.12)           | 3981.75(3548.73-<br>4417.55)       | 79.88(72.8<br>9-87.84)           |
|             | <b>ASPR<br/>(per<br/>100,000)</b>    | 7926.45(744<br>0.72-<br>8419.84)       | 4618.39(42<br>56.57-<br>4984.11)       | 13.10(1<br>1.61-<br>14.83)    | 3.94(3.0<br>7-4.90)           | 1.72(1.35-<br>2.20)     | 4.34(3.43-<br>5.60)           | 3.11(2.57-<br>3.74)           | 3798.44(3386.57-<br>4234.09)       | 87.99(80.3<br>0-96.54)           |
|             | <b>female</b>                        | 8411.22(788<br>9.66-<br>8935.21)       | 4745.34(43<br>53.84-<br>5141.70)       | 1.96(1.<br>69-<br>2.29)       | 0.40(0.2<br>9-0.55)           | 0.62(0.45-<br>0.89)     | 0.28(0.20-<br>0.38)           | 0.66(0.53-<br>0.82)           | 4168.66(3723.08-<br>4614.65)       | 73.71(67.1<br>6-80.97)           |
|             | <b>No. incidence*10<sup>3</sup></b>  | 62161.3<br>(55134.8-<br>69320.7)       | 18475.7<br>(16736.0-<br>20255.6)       | 60.1<br>(53.1-<br>67.0)       | 23.7<br>(19.1-<br>29.0)       | 9.4 (7.7-<br>11.6)      | 15.1<br>(12.0-<br>19.8)       | 11.9 (9.9-<br>14.3)           | 43123.4 (36191.5-<br>50226.4)      | 502.2<br>(458.8-<br>550.0)       |
| <b>2017</b> | <b>both sexes</b>                    | 833.08<br>(730.32-<br>937.91)          | 230.07<br>(209.25-<br>251.56)          | 0.75<br>(0.66-<br>0.84)       | 0.30<br>(0.24-<br>0.36)       | 0.12 (0.10-<br>0.15)    | 0.19<br>(0.15-<br>0.25)       | 0.15<br>(0.12-<br>0.18)       | 595.97 (495.28-<br>700.24)         | 6.30 (5.75-<br>6.89)             |
|             | <b>ASIR<br/>(per<br/>100,000)</b>    | 826.92<br>(725.52-<br>932.84)          | 243.42<br>(222.31-<br>265.37)          | 1.45<br>(1.28-<br>1.62)       | 0.60<br>(0.48-<br>0.73)       | 0.20 (0.17-<br>0.24)    | 0.39<br>(0.31-<br>0.50)       | 0.25<br>(0.21-<br>0.30)       | 574.69 (474.57-<br>678.50)         | 7.36 (6.71-<br>8.04)             |
|             | <b>female</b>                        | 842.09<br>(738.53-<br>946.10)          | 218.97<br>(197.87-<br>239.73)          | 0.15<br>(0.13-<br>0.17)       | 0.03<br>(0.02-<br>0.04)       | 0.05 (0.03-<br>0.06)    | 0.02<br>(0.01-<br>0.02)       | 0.05<br>(0.04-<br>0.07)       | 617.55 (514.14-<br>723.19)         | 5.42 (4.95-<br>5.94)             |
|             | <b>No. prevalence*10<sup>3</sup></b> | 544899.16(5<br>06937.52-<br>584858.36) | 299398.15(<br>269025.16-<br>330073.84) | 527.46(<br>470.01-<br>593.19) | 162.37(<br>127.47-<br>202.62) | 92.15(73.11<br>-118.32) | 147.88(11<br>7.46-<br>190.14) | 125.07(10<br>4.97-<br>149.25) | 272677.53(242295<br>.87-304699.57) | 6234.16(56<br>61.00-<br>6848.17) |

|                                   |                   |                                  |                                  |                            |                     |                     |                     |                     |                              |                        |
|-----------------------------------|-------------------|----------------------------------|----------------------------------|----------------------------|---------------------|---------------------|---------------------|---------------------|------------------------------|------------------------|
|                                   | <b>both sexes</b> | 6991.55(649<br>6.73-<br>7516.36) | 3740.74(33<br>69.84-<br>4120.82) | 6.63(5.<br>91-<br>7.44)    | 2.04(1.5<br>9-2.54) | 1.15(0.93-<br>1.48) | 1.87(1.48-<br>2.40) | 1.56(1.32-<br>1.86) | 3599.59(3175.10-<br>4039.91) | 78.22(70.9<br>5-85.96) |
| <b>ASPR<br/>(per<br/>100,000)</b> | <b>male</b>       | 6731.06(624<br>8.26-<br>7267.53) | 3711.47(33<br>34.68-<br>4101.16) | 12.57(1<br>1.14-<br>14.13) | 4.04(3.1<br>6-5.02) | 1.89(1.54-<br>2.36) | 3.88(3.07-<br>5.02) | 2.75(2.31-<br>3.29) | 3361.74(2951.90-<br>3778.37) | 86.87(78.7<br>5-95.25) |
|                                   | <b>female</b>     | 7266.92(674<br>1.78-<br>7824.87) | 3791.44(34<br>30.97-<br>4165.95) | 1.62(1.<br>40-<br>1.88)    | 0.33(0.2<br>4-0.43) | 0.53(0.39-<br>0.75) | 0.21(0.16-<br>0.27) | 0.54(0.44-<br>0.67) | 3833.87(3394.76-<br>4292.91) | 71.25(64.6<br>7-78.40) |

\*Data in parentheses shown as 95% UI.

ASIR, age-standardized incidence rate; ASPR, age-standardized prevalence rate; CWP, coal workers pneumoconiosis.
